## Correction

# Correction: Beyond Muscles Stiffness: Importance of State-Estimation to Account for Very Fast Motor Corrections

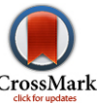

The *PLOS Computational Biology* Staff

## Notice of Republication

This article was republished on the 14<sup>th</sup> of October, 2014, to correct errors in equations that were introduced during the typesetting process. Please download this article again to view the correct version. The originally published, uncorrected article and the republished, corrected article are provided here for reference.

## Supporting Information

**File S1.** Originally published, uncorrected article.  
(PDF)

**File S2.** Republished corrected article.  
(PDF)

## Reference

1. Crevecoeur F, Scott SH (2014) Beyond Muscles Stiffness: Importance of State-Estimation to Account for Very Fast Motor Corrections. *PLoS Comput Biol* 10(10): e1003869. doi:10.1371/journal.pcbi.1003869

**Citation:** The *PLOS Computational Biology* Staff (2014) Correction: Beyond Muscles Stiffness: Importance of State-Estimation to Account for Very Fast Motor Corrections. *PLoS Comput Biol* 10(10): e1003996. doi:10.1371/journal.pcbi.1003996

**Published:** October 30, 2014

**Copyright:** © 2014 The *PLOS Computational Biology* Staff. This is an open-access article distributed under the terms of the Creative Commons Attribution License, which permits unrestricted use, distribution, and reproduction in any medium, provided the original author and source are credited.
